# Supplementary material for: Can milk cell or skim milk miRNAs be used as biomarkers for early pregnancy detection in cattle?
Source: PLoS One. 2017 Feb 24;12(2):e0172220. doi: 10.1371/journal.pone.0172220 (PMC5325256; doi:10.1371/journal.pone.0172220)
Supplement: S1 Table — All miRNAs with more than 50 reads found in MC and/or SM are listed. Mean readcounts of all 36 MC or 35 SM samples and the corresponding ratio to all miRNA reads are listed. The variation of the ratio among the samples is shown as SEM. (XLSX) [file pone.0172220.s001.xlsx]

## Sheet: Sheet1
	Milk Cells					Skim Milk
Rank	miRNA	Mean Reads	% of total Reads	SEM % of total reads		miRNA	Mean Reads	% of total Reads	SEM % of total reads
1	bta-miR-148a	69060.5	0.227711	0.0811981		bta-miR-148a	42538.8	0.286321	0.0399837
2	bta-miR-21-5p	49447.5	0.176066	0.0710566		bta-miR-30a-5p	13580.6	0.0927091	0.0183722
3	bta-miR-30a-5p	14760	0.0481454	0.0211735		bta-miR-21-5p	10809.6	0.0749288	0.0245801
4	bta-miR-200a	11084.1	0.036643	0.0119314		bta-miR-200a	9162.33	0.0622026	0.0143171
5	bta-let-7f	9761.11	0.0334983	0.00651864		bta-miR-3600	7935.23	0.0542823	0.0130074
6	bta-miR-26a	9760.11	0.0339063	0.00872608		bta-miR-2340	5680.18	0.0386902	0.0107366
7	bta-let-7g	9636.97	0.0331337	0.00632087		bta-miR-99a-5p	5174.94	0.0348379	0.00671721
8	bta-let-7a-5p	8195.88	0.0274357	0.00631583		bta-let-7a-5p	4202.46	0.0288759	0.00800136
9	bta-miR-99a-5p	7401.26	0.0248773	0.00786774		bta-miR-200c	3520.91	0.0247302	0.0128494
10	bta-miR-200c	4836.53	0.0161814	0.00772294		bta-miR-92a	3517.22	0.0242599	0.00707961
11	bta-miR-3600	4476.8	0.0152981	0.00232211		bta-miR-320a	2698.53	0.0187922	0.00816609
12	bta-miR-26b	4434.41	0.015852	0.00834381		bta-miR-26a	2167.07	0.0149457	0.00410931
13	bta-miR-29a	4282.62	0.0150473	0.00658941		bta-let-7g	1978.39	0.0134226	0.00448819
14	bta-miR-26c	4221.79	0.0146459	0.0038016		bta-miR-186	1953	0.0134541	0.00272837
15	bta-miR-30e-5p	3601.37	0.0125141	0.0034036		bta-let-7b	1907.35	0.012936	0.00287988
16	bta-miR-30d	3508.47	0.0120016	0.00216535		bta-let-7f	1877.91	0.0129322	0.00487858
17	bta-let-7b	3309.96	0.0111104	0.00278298		bta-miR-30d	1770.01	0.0123315	0.00448944
18	bta-miR-27b	3300.87	0.0113553	0.00180406		bta-miR-23a	1392.79	0.00974762	0.0041705
19	bta-miR-103	3053.27	0.0106033	0.00223687		bta-miR-423-5p	1362.96	0.00936335	0.00273814
20	bta-miR-186	3012.79	0.0105385	0.00259109		bta-miR-27b	1284.42	0.00870166	0.00246291
21	bta-let-7i	2974.74	0.0105376	0.00457232		bta-miR-30e-5p	1063.67	0.0072928	0.00134615
22	bta-miR-27a-3p	2586.83	0.00930803	0.00466443		bta-miR-26c	957.811	0.00660491	0.00167952
23	bta-miR-191	2511.09	0.00902547	0.00436472		bta-miR-103	944.879	0.00658981	0.00199638
24	bta-miR-92a	2418.97	0.00846245	0.0021215		bta-miR-20a	935.681	0.00651983	0.00237251
25	bta-miR-20a	2101.34	0.00729463	0.0018365		bta-miR-181a	872.678	0.00605368	0.00195989
26	bta-miR-23a	2049.13	0.00730108	0.00362251		bta-miR-3596	820.914	0.00555615	0.00119201
27	bta-miR-181a	1844.26	0.0064272	0.00179214		bta-miR-532	790.985	0.00532678	0.00118842
28	bta-miR-24-3p	1804.7	0.00642097	0.00239299		bta-miR-29a	758.075	0.00520453	0.00106209
29	bta-miR-200b	1696.58	0.00570943	0.00278164		bta-miR-26b	722.655	0.00498781	0.00177987
30	bta-miR-101	1659.74	0.00566868	0.00145911		bta-miR-200b	708.954	0.00496508	0.00219003
31	bta-miR-3596	1426.58	0.00478236	0.0012256		bta-miR-100	684.085	0.00476066	0.00201169
32	bta-miR-423-3p	1302.62	0.00451421	0.00109031		bta-miR-24-3p	647.778	0.00453056	0.00171139
33	bta-miR-25	1302.29	0.0047192	0.0027927		bta-miR-378	638.478	0.00442335	0.00180414
34	bta-miR-150	1196.43	0.00426023	0.00231354		bta-let-7c	545.323	0.00371939	0.00089655
35	bta-miR-100	1169.9	0.00399848	0.00201159		bta-miR-191	530.853	0.0037145	0.0013267
36	bta-miR-125b	1051.61	0.00362521	0.00159566		bta-miR-141	499.978	0.00340176	0.0011829
37	bta-miR-141	980.871	0.00326341	0.00120716		bta-miR-101	487.089	0.00324676	0.00196576
38	bta-miR-223	889.919	0.00335535	0.00384021		bta-miR-23b-3p	450.085	0.00312544	0.000984701
39	bta-let-7c	886.203	0.00297477	0.00066004		bta-miR-22-3p	448.357	0.00307566	0.000453884
40	bta-miR-532	824.47	0.00281101	0.000437955		bta-let-7i	374.166	0.00256112	0.00111995
41	bta-miR-2340	801.123	0.0028256	0.0012806		bta-miR-1839	362.791	0.00246432	0.000407058
42	bta-let-7d	770.385	0.00269127	0.000734509		bta-miR-25	362.057	0.00252723	0.00104495
43	bta-miR-30f	755.773	0.00254785	0.000912399		bta-miR-423-3p	357.476	0.00242678	0.000624094
44	bta-miR-19b	753.488	0.00266194	0.00104349		bta-miR-29c	356.675	0.00244714	0.000653261
45	bta-miR-142-5p	740.866	0.00271528	0.00186638		bta-miR-2284x	348.722	0.00237468	0.000645471
46	bta-miR-2484	712.812	0.00252877	0.00123749		bta-miR-30b-5p	329.554	0.00228736	0.000699258
47	bta-miR-16a	688.012	0.00248853	0.00122674		bta-miR-30f	323.709	0.00226391	0.00103762
48	bta-miR-23b-3p	687.179	0.0023968	0.000702986		bta-let-7d	284.473	0.0019686	0.000611435
49	bta-miR-148b	685.573	0.00238982	0.00058915		bta-miR-2285t	281.236	0.00186444	0.00119517
50	bta-miR-30b-5p	674.658	0.00231737	0.000494643		bta-miR-148b	273.565	0.0018618	0.000551774
51	bta-miR-339a	642.521	0.00228076	0.000794958		bta-miR-27a-3p	269.283	0.00185971	0.000838596
52	bta-miR-423-5p	621.784	0.00217423	0.000759975		bta-miR-107	256.415	0.00175929	0.000362453
53	bta-miR-146a	587.33	0.00216111	0.00169303		bta-miR-17-5p	246.961	0.00174765	0.000897346
54	bta-miR-107	576.428	0.00197443	0.000349515		bta-miR-2284k	233.267	0.00159674	0.000306136
55	bta-miR-378	532.315	0.00190503	0.00110655		bta-miR-19b	211.664	0.00146046	0.000532063
56	bta-miR-17-5p	499.449	0.0017799	0.000769773		bta-miR-151-3p	211.609	0.00146979	0.00046954
57	bta-miR-98	489.277	0.00168093	0.000367525		bta-miR-125b	191.319	0.00132298	0.000358513
58	bta-miR-221	476.422	0.00177052	0.00139854		bta-miR-660	189.297	0.00130458	0.000301101
59	bta-miR-7	455.81	0.00156751	0.000728013		bta-miR-669	186.485	0.00130217	0.000568665
60	bta-miR-320a	453.331	0.00155592	0.000722435		bta-miR-181b	174.26	0.00120227	0.00036069
61	bta-miR-22-3p	445.075	0.00151882	0.000240563		bta-miR-193a-5p	168.18	0.00116074	0.00042217
62	bta-miR-125a	436.816	0.00149691	0.000536524		bta-miR-339a	163.623	0.00114411	0.000404828
63	bta-miR-660	426.338	0.00146076	0.000333738		bta-miR-652	162.609	0.00113213	0.000329492
64	bta-miR-140	406.386	0.00147922	0.00099871		bta-miR-140	161.34	0.00113738	0.000610515
65	bta-miR-106b	405.537	0.00146072	0.000828359		bta-miR-152	160.559	0.00109963	0.000270408
66	bta-miR-29c	394.211	0.00132599	0.000538653		bta-miR-429	129.223	0.000888001	0.000201019
67	bta-miR-1839	355.223	0.00120728	0.000177876		bta-miR-574	119.982	0.000806466	0.000267631
68	bta-miR-1246	346.728	0.00123048	0.000867862		bta-miR-29b	115.743	0.000789534	0.000230571
69	bta-miR-128	332.505	0.00116485	0.000388349		bta-miR-16a	106.468	0.000749401	0.000297814
70	bta-miR-192	330.243	0.0011667	0.000371845		bta-miR-502a	105.114	0.000718598	0.00018697
71	bta-miR-146b	321.158	0.00116432	0.000641951		bta-miR-2284y	95.1996	0.000646309	0.000157708
72	bta-miR-151-3p	316.592	0.00109744	0.000368566		bta-miR-98	95.1353	0.00065119	0.000261804
73	bta-miR-29b	307.449	0.00105111	0.00053769		bta-miR-30c	94.1834	0.000661448	0.000253857
74	bta-miR-429	293.941	0.00097326	0.000375199		bta-miR-22-5p	86.2951	0.000582444	0.000220922
75	bta-miR-2285t	291.661	0.000955918	0.000539061		bta-miR-182	83.5724	0.000573012	0.00018574
76	bta-miR-30c	289.592	0.00101773	0.000291718		bta-miR-185	80.329	0.000559828	0.000165744
77	bta-miR-2284x	261.06	0.000913645	0.000291726		bta-miR-99b	73.8718	0.000509652	0.000144998
78	bta-miR-181b	257.751	0.000890147	0.000184027		bta-miR-210	70.884	0.000494249	0.000178325
79	bta-miR-32	250.911	0.000867627	0.000206058		bta-miR-361	66.2624	0.000467014	0.000208559
80	bta-miR-185	246	0.000867966	0.000251056		bta-miR-374b	65.6432	0.000455659	0.000154013
81	bta-miR-152	245.673	0.000814649	0.000279123		bta-miR-7	65.2489	0.000445058	0.000135405
82	bta-miR-155	240.485	0.000869513	0.00066054		bta-miR-365-3p	60.7404	0.000422481	0.000146554
83	bta-miR-182	235.324	0.00078234	0.00026434		bta-miR-339b	59.8089	0.000416733	0.000122294
84	bta-miR-2892	229.056	0.000795718	0.000482725		bta-miR-484	58.8991	0.000409962	0.000132329
85	bta-miR-652	225.066	0.000811526	0.000515268		bta-miR-499	57.1739	0.000376482	0.000250715
86	bta-miR-342	222.267	0.000807061	0.000514023		bta-miR-2904	53.608	0.000351463	0.000184738
87	bta-miR-16b	209.849	0.00075548	0.00033607		bta-miR-32	52.9162	0.000358298	0.000206434
88	bta-miR-451	200.334	0.000706153	0.00138929		bta-miR-106b	51.304	0.000355946	0.000140537
89	bta-miR-574	189.002	0.000642422	0.000143725
90	bta-miR-339b	183.804	0.00063865	0.000164375
91	bta-miR-2332	182.902	0.000665059	0.000434053
92	bta-miR-222	172.944	0.000638733	0.000477894
93	bta-miR-19a	166.065	0.000596901	0.000369858
94	bta-miR-669	164.906	0.000570576	0.000339488
95	bta-miR-143	156.112	0.000506581	0.00146932
96	bta-miR-15b	155.1	0.000570214	0.000404109
97	bta-miR-93	138.289	0.00050195	0.000304402
98	bta-miR-484	137.34	0.000480841	0.000157085
99	bta-miR-193a-5p	137.192	0.000467168	0.000218205
100	bta-miR-374b	131.949	0.000466609	0.000147478
101	bta-miR-99b	131.398	0.000451899	0.000194983
102	bta-miR-2898	131.084	0.000453637	0.00031195
103	bta-miR-183	129.656	0.000426146	0.000175373
104	bta-miR-2284k	127.813	0.000443802	0.000114049
105	bta-miR-6119-5p	116.333	0.00041386	0.000149506
106	bta-miR-499	115.246	0.00038583	0.000164243
107	bta-let-7a-3p	110.689	0.000369985	0.00011913
108	bta-miR-28	107.193	0.000376006	0.000104547
109	bta-miR-361	106.002	0.000382669	0.000178107
110	bta-miR-15a	105.723	0.000382466	0.000209836
111	bta-miR-210	101.129	0.000354494	9.05424e-05
112	bta-miR-2285f	96.6801	0.000350269	0.000201998
113	bta-miR-374a	94.2145	0.000333808	0.000140301
114	bta-miR-22-5p	90.2746	0.000303662	6.62763e-05
115	bta-miR-194	89.176	0.000320616	0.000167384
116	bta-miR-151-5p	88.9347	0.000307084	0.000177228
117	bta-miR-362-5p	86.9179	0.00029977	5.29655e-05
118	bta-miR-96	86.8602	0.00029043	9.39382e-05
119	bta-miR-769	80.7147	0.000290419	0.000141535
120	bta-miR-2284y	80.2962	0.000277378	7.00104e-05
121	bta-miR-365-3p	78.5243	0.000269792	0.000143087
122	bta-miR-193a-3p	74.5324	0.00024752	0.000192837
123	bta-miR-1260b	67.5712	0.000228757	9.92175e-05
124	bta-miR-502a	62.2144	0.000211528	5.60201e-05
125	bta-miR-33a	60.1992	0.000210009	0.000112541
126	bta-miR-2478	59.6679	0.000204325	0.000117727
127	bta-miR-2284m	59.1277	0.000206058	6.07042e-05
128	bta-miR-2890	55.0726	0.000185489	0.000148085
129	bta-miR-147	52.0735	0.000192549	0.000180188
130	bta-miR-378c	50.6286	0.000180162	8.43887e-05
131	bta-miR-34a	50.2506	0.000172726	5.61425e-05
132	bta-miR-2419-5p	49.5257	0.000176906	0.000153128
