# Supplementary material for: Can milk cell or skim milk miRNAs be used as biomarkers for early pregnancy detection in cattle?
Source: PLoS One. 2017 Feb 24;12(2):e0172220. doi: 10.1371/journal.pone.0172220 (PMC5325256; doi:10.1371/journal.pone.0172220)
Supplement: S2 Table — miRNAs with significant fold-changes/ratios either between pregnancy and cycle on days 4, 12 or 18 (p-value derived from Deseq2) and/or between the expression change from day 4 to 18 change of cycle and pregnancy (p-value derived from paired t-test between fold-changes/ratios of pregnant and cyclic group). (XLSX) [file pone.0172220.s002.xlsx]

## Sheet: Sheet1
		FoldChange	pvalue	FoldChange	pvalue	FoldChange	pvalue	FoldChange	FoldChange	pvalue
	Reads	4 pregnant/4 cyclic		12 pregnant/12 cyclic		18 pregnant/18 cyclic		18 cyclic/4 cyclic	18 pregnant/4 pregnant	(18 cyclic/4 cyclic) vs. (18 pregnant/4 pregnant)
bta-let-7i	2974.74	0.816365	0.250227	0.712327	0.0544987	1.45463	0.0336279	0.740545	1.31953	0.00673
bta-miR-100	1169.9	1.20822	0.393453	1.04114	0.855587	0.593431	0.0184998	1.56788	0.77008	0.0239
bta-miR-106b	405.537	0.747424	0.173818	1.1073	0.633688	1.62139	0.0237773	0.677796	1.47034	0.0108
bta-miR-125a	436.816	1.34826	0.11202	1.11037	0.576988	0.821522	0.29494	1.21267	0.7389	0.0092
bta-miR-125b	1051.61	1.19405	0.366316	1.21436	0.322139	0.680718	0.0499431	1.28629	0.733305	0.00278
bta-miR-1260b	67.5712	1.19233	0.397114	1.30177	0.20274	0.647868	0.0348214	1.45038	0.788082	0.133
bta-miR-140	406.386	0.643585	0.0494377	1.64154	0.0269476	1.35475	0.175208	0.746401	1.57117	0.0194
bta-miR-143	156.112	1.16883	0.566572	1.24194	0.425989	3.83195	7.9533e-07	1.0874	3.565	0.499
bta-miR-146a	587.33	0.662526	0.119999	0.804172	0.410427	1.28948	0.336912	0.738562	1.43746	0.0108
bta-miR-148a	69060.5	1.40616	0.129312	0.824354	0.390046	0.896664	0.62741	1.13345	0.722767	0.0356
bta-miR-152	245.673	1.4766	0.0756031	0.930088	0.740779	0.817652	0.357942	1.29143	0.715115	0.0182
bta-miR-15a	105.723	0.795328	0.31317	1.08067	0.732266	1.43508	0.11022	0.769815	1.38904	0.00165
bta-miR-15b	155.1	0.660937	0.0915981	1.40907	0.16187	1.48135	0.108759	0.695904	1.55972	0.0299
bta-miR-16a	688.012	0.758424	0.171812	1.26881	0.238962	1.29034	0.207194	0.834075	1.41905	0.0331
bta-miR-182	235.324	1.34837	0.167508	0.899365	0.623746	0.783325	0.258511	1.28921	0.748956	0.0403
bta-miR-183	129.656	1.25793	0.319715	0.840788	0.451141	0.801516	0.33584	1.33109	0.848127	0.0196
bta-miR-193a-5p	137.192	1.33651	0.188206	1.10226	0.658017	0.632729	0.0373524	1.38068	0.653639	0.00873
bta-miR-200b	1696.58	1.35724	0.174239	1.09671	0.681301	0.528001	0.00449023	1.6134	0.627655	0.0179
bta-miR-200c	4836.53	1.3586	0.184284	1.08287	0.730144	0.565291	0.013458	1.59284	0.662752	0.017
bta-miR-221	476.422	0.647564	0.101689	1.10473	0.7075	1.6406	0.0621721	0.665971	1.68724	0.0124
bta-miR-223	889.919	0.634743	0.0939784	1.67748	0.0566531	1.77592	0.0343389	0.659348	1.84476	0.0789
bta-miR-2285f	96.6801	0.678481	0.0794419	1.30736	0.223393	1.41591	0.113426	0.764398	1.59521	0.0315
bta-miR-2332	182.902	0.57926	0.0180399	1.40321	0.140152	0.801854	0.336369	1.15283	1.59583	0.0284
bta-miR-26b	4434.41	0.778366	0.190137	1.12437	0.539878	1.53109	0.0258937	0.675632	1.329	0.0277
bta-miR-27a-3p	2586.83	0.728465	0.111907	1.20487	0.349547	1.24649	0.268729	0.845448	1.44666	0.0444
bta-miR-2890	55.0726	1.16586	0.56496	1.0719	0.794475	0.674712	0.139747	1.20626	0.698096	0.0225
bta-miR-2898	131.084	1.24496	0.330896	1.58056	0.0420991	0.669674	0.0746114	1.23899	0.66646	0.013
bta-miR-29b	307.449	1.54144	0.0414019	0.830115	0.380238	0.849026	0.440012	1.18462	0.652492	0.178
bta-miR-29c	394.211	1.54689	0.0392966	0.978826	0.919477	0.895812	0.60301	1.07524	0.622673	0.0834
bta-miR-30a-5p	14760	1.26017	0.341953	0.737887	0.211603	0.723671	0.183806	1.18195	0.678752	0.0366
bta-miR-320a	453.331	1.02348	0.908075	1.0871	0.6773	0.626543	0.0197867	1.3216	0.809044	0.0391
bta-miR-429	293.941	1.25541	0.314943	0.829834	0.409713	0.695265	0.108005	1.23631	0.684687	0.0249
bta-miR-652	225.066	0.613964	0.0193781	1.41385	0.0963294	1.48172	0.0586123	0.670547	1.61828	0.0265
bta-miR-769	80.7147	0.690951	0.0495926	1.12241	0.536191	1.49573	0.0301903	0.717952	1.55418	0.0427
bta-miR-93	138.289	0.695492	0.0896161	1.25492	0.286629	1.82045	0.00488497	0.675765	1.76881	0.00216
bta-miR-99b	131.398	1.25122	0.24879	1.24294	0.259969	0.744346	0.126277	1.30996	0.779291	0.0161
bta-miR-20a	2101.34	0.937947	0.588342	0.954707	0.694868	0.736852	0.0097201	1.24153	0.975346	0.0274
bta-miR-2332	182.902	0.57926	0.0180399	1.40321	0.140152	0.801854	0.336369	1.15283	1.59583	0.0284
bta-miR-26a	9760.11	0.901632	0.361503	0.939257	0.580731	1.28627	0.0264725	0.807759	1.15235	0.0259
bta-miR-26c	4221.79	0.895137	0.340665	0.90478	0.389309	1.3045	0.0221416	0.772547	1.12585	0.0234
bta-miR-186	3012.79	0.960952	0.725873	0.918331	0.452976	1.3368	0.010532	0.803159	1.11729	0.0365
bta-miR-30f	755.773	1.12819	0.55417	0.894751	0.585386	0.742877	0.144776	1.04583	0.688644	0.0114
