# Supplementary material for: Can milk cell or skim milk miRNAs be used as biomarkers for early pregnancy detection in cattle?
Source: PLoS One. 2017 Feb 24;12(2):e0172220. doi: 10.1371/journal.pone.0172220 (PMC5325256; doi:10.1371/journal.pone.0172220)
Supplement: S3 Table — miRNAs with significant fold-changes/ratios in the process of cycle and/or pregnancy from day 4 to 18. p-value are derived from Deseq2. (XLSX) [file pone.0172220.s003.xlsx]

## Sheet: Sheet1
		FoldChange	pvalue	FoldChange	pvalue
	Reads	18 cyclic/4 cyclic		18 pregnant/4 pregnant
bta-miR-100	1169.9	1.56788	0.0423803	0.77008	0.238468
bta-miR-140	406.386	0.746401	0.191681	1.57117	0.0439087
bta-miR-141	980.871	1.23251	0.338871	0.620111	0.028826
bta-miR-143	156.112	1.0874	0.758192	3.565	3.00006e-06
bta-miR-147	52.0735	0.689267	0.164912	1.86062	0.0205943
bta-miR-192	330.243	0.983529	0.90262	1.30884	0.0483254
bta-miR-200b	1696.58	1.6134	0.0333222	0.627655	0.0382779
bta-miR-200c	4836.53	1.59284	0.043706	0.662752	0.0747235
bta-miR-221	476.422	0.665971	0.125678	1.68724	0.0487955
bta-miR-223	889.919	0.659348	0.124878	1.84476	0.0240557
bta-miR-2285f	96.6801	0.764398	0.222132	1.59521	0.0344232
bta-miR-2332	182.902	1.15283	0.535995	1.59583	0.0428503
bta-miR-25	1302.29	0.781524	0.228912	1.67707	0.0116477
bta-miR-26b	4434.41	0.675632	0.0403114	1.329	0.136916
bta-miR-26c	4221.79	0.772547	0.0263775	1.12585	0.307804
bta-miR-29b	307.449	1.18462	0.424383	0.652492	0.0440505
bta-miR-29c	394.211	1.07524	0.731785	0.622673	0.0251517
bta-miR-652	225.066	0.670547	0.0547414	1.61828	0.0209611
bta-miR-769	80.7147	0.717952	0.0755337	1.55418	0.0187444
bta-miR-93	138.289	0.675765	0.0660983	1.76881	0.0075672
