# Supplementary material for: Can milk cell or skim milk miRNAs be used as biomarkers for early pregnancy detection in cattle?
Source: PLoS One. 2017 Feb 24;12(2):e0172220. doi: 10.1371/journal.pone.0172220 (PMC5325256; doi:10.1371/journal.pone.0172220)
Supplement: S4 Table — miRNAs with significant fold-changes/ratios either between pregnancy and cycle on days 4, 12 or 18 (p-value derived from Deseq2) and/or between the expression change from day 4 to 18 of cycle and pregnancy (p-value derived from paired t-test between fold-changes/ratios of pregnant and cyclic group). (XLSX) [file pone.0172220.s004.xlsx]

## Sheet: Sheet1
		FoldChange	pvalue	FoldChange	pvalue	FoldChange	pvalue	FoldChange	FoldChange	pvalue
	Reads	4 pregnant/4 cyclic		12 pregnant/12 cyclic		18 pregnant/18 cyclic		18 cyclic/4 cyclic	18 pregnant/4 pregnant	(18 cyclic/4 cyclic) vs. (18 pregnant/4 pregnant)
bta-miR-29b	115.953	1.87669	4.56364e-06	1.30146	0.0520644	1.09669	0.516005	0.699903	1.1977	0.0524
bta-miR-140	162.903	0.671091	0.0253023	1.20483	0.295704	1.20328	0.317407	1.32941	0.741433	0.11
bta-miR-29c	355.871	1.45124	0.0110807	1.22896	0.158106	0.937211	0.671166	0.784671	1.21504	0.175
bta-miR-29a	751.642	1.20841	0.0977534	0.789741	0.0384771	0.842116	0.150656	0.888455	1.27491	0.0416
bta-miR-20a	946.565	0.858923	0.374668	1.4232	0.0392586	0.910449	0.598419	0.912084	0.860466	0.85
bta-miR-92a	3459.8	0.996695	0.981919	0.631523	0.00164937	0.70054	0.0195236	0.978917	1.39276	0.202
bta-miR-21-5p	11099.9	1.01496	0.932154	1.43438	0.0386014	1.20934	0.294899	0.96333	0.808492	0.503
bta-miR-181b	172.185	0.892013	0.422991	0.750146	0.0425118	0.848539	0.267694	0.932453	0.980226	0.717
bta-miR-25	359.626	0.7103	0.0135174	1.04285	0.762231	0.990295	0.946225	1.295	0.928855	0.213
bta-miR-125b	190.059	1.09004	0.566241	0.990978	0.951711	0.860241	0.336139	0.888991	1.12647	0.0137
bta-miR-185	80.7376	0.860807	0.274855	1.37288	0.0194339	0.982418	0.900271	0.975708	0.854928	0.943
