# Supplementary material for: Can milk cell or skim milk miRNAs be used as biomarkers for early pregnancy detection in cattle?
Source: PLoS One. 2017 Feb 24;12(2):e0172220. doi: 10.1371/journal.pone.0172220 (PMC5325256; doi:10.1371/journal.pone.0172220)
Supplement: S5 Table — miRNAs with significant fold-changes/ratio in the process of cycle and/or pregnancy from day 4 to 18. p-value are derived from Deseq2. (XLSX) [file pone.0172220.s005.xlsx]

## Sheet: Sheet1
		FoldChange	pvalue	FoldChange	pvalue
	Reads	18 cyclic/4 cyclic		18 pregnant/4 pregnant
bta-miR-29b	115.953	1.42877	0.0131648	0.834936	0.182799
bta-miR-29a	751.642	1.12555	0.321954	0.78437	0.0338842
bta-miR-92a	3459.8	1.02154	0.888753	0.718001	0.0233923
