# Supplementary material for: Can milk cell or skim milk miRNAs be used as biomarkers for early pregnancy detection in cattle?
Source: PLoS One. 2017 Feb 24;12(2):e0172220. doi: 10.1371/journal.pone.0172220 (PMC5325256; doi:10.1371/journal.pone.0172220)
Supplement: S6 Table — Progesterone Concentrations [ng/ml] measured in milk according to Prakash et al. 1987 [28]. Concentrations were used for cycle and pregnancy control. (XLSX) [file pone.0172220.s006.xlsx]

## Sheet: Sheet1
Progesteron concentration [ng/ml]
	cyclic			pregnant
	Day 4	Day 12	Day 18	Day 4	Day 12	Day 18
Animal 1	0.3	2.5	>3	<0,2	2.1	2.8
Animal 2	0.3	2.9	2.8	<0,2	2.5	>3
Animal 3	<0,2	1.3	2.1	0.2	1.3	2.1
Animal 4	<0,2	1.2	1.7	<0,2	1.2	1.1
Animal 5	0.3	2.7	<0,2	<0,2	2.4	>3
Animal 6	<0,2	1.1	<0,2	<0,2	1.4	1.3
Animal 7	0.4	2	2.5	<0,2	1.8	2.4
Animal 8	0.3	2.1	<0,2	0.2	1.9	1.9
Animal 9	0.4	2.3	>3	0.5	>3	>3
Animal 10	0.2	1.4	1.5	<0,2	1	1.5
